# Supplementary material for: Reducing the cyan-cavity: Lu2MAl4SiO12:Ce3+ (M = Mg, Ca, Sr and Ba) phosphor-in-glass film towards full-spectrum laser-driven lighting
Source: Royal Society of Chemistry journal article supplement (doi:10.1039/d2tc03745a), 2022-01-01
Supplement: d2tc03745a1.pdf [file d2tc03745a1.pdf]

Electronic Supplementary Material (ESI) for Journal of Materials  
Chemistry C.

**Reducing the cyan-cavity:  $\text{Lu}_2\text{MAl}_4\text{SiO}_{12}:\text{Ce}^{3+}$  (M = Mg, Ca, Sr and  
Ba) phosphor-in-glass film towards full-spectrum laser-driven  
lighting**

Pengfei Wang,<sup>ad</sup> Hang Lin,<sup>\*abc</sup> Shisheng Lin,<sup>a</sup> Ping Sui,<sup>ad</sup> Ju Xu,<sup>a</sup> Yao Cheng,<sup>a</sup>  
Yuansheng Wang<sup>\*a</sup>

<sup>a</sup> Key Laboratory of Optoelectronic Materials Chemistry and Physics, Fujian Institute of Research  
on the Structure of Matter, Chinese Academy of Sciences, Fuzhou, Fujian, 350002, China.

<sup>b</sup> Engineering Research Center of Advanced Glass Manufacturing Technology, Ministry of  
Education, Donghua University, Shanghai 201620, China.

<sup>c</sup> Fujian Science & Technology Innovation Laboratory for Optoelectronic Information of China,  
Fuzhou, Fujian, 350108, China.

<sup>d</sup> College of Chemistry and Materials Science, Fujian Normal University, Fujian, Fuzhou, 350007,  
China.

---

E-mail: lingsh@fjirsm.ac.cn; Tel/Fax: +86-591-63179423

E-mail: yswang@fjirsm.ac.cn; Tel/Fax: +86-591-63179438

### Supplementary Note S1:

According to the model proposed by Morrison and developed by Dorenbos, the centroid shift ( $\varepsilon_c$ ) of  $\text{Ce}^{3+}$  5d levels is positively correlated with the anion polarizability ( $\alpha_{sp}$ ). The anion polarizability in  $\text{Ce}^{3+}$ -doped oxide compounds can be estimated by

$$\alpha_{sp} = 0.33 + \frac{4.8}{\chi^2} \quad (1)$$

Therefore, the anion polarizability is influenced by the average electronegativity  $\chi_{av}$  of the cations, defined as follows:

$$\chi_{av} = \frac{1}{N_a} \sum_1^{N_c} \frac{z_i \chi_i}{\gamma_i} \quad (2)$$

where  $N_c$  is the sum of all cations in the compound;  $N_a$  is the number of anions in the formula;  $\chi_i$  represents the electronegativity of cation  $i$  with formal charge  $z_i$ , and  $\gamma$  is the formal negative charge of the anion. The  $\chi_{av}$  values of  $M = \text{Mg}, \text{Ca}, \text{Sr}$  and  $\text{Ba}$  in  $\text{LMAS}:\text{Ce}^{3+}$  were calculated to be 1.548, 1.523, 1.518 and 1.513, respectively, by using the Pauling-type electronegativity values and Equation S2. According to Equation S1, a decrease in  $\chi_{av}$  will lead to an increase in the anion polarizability  $\alpha_{sp}$ . As a result, the  $\varepsilon_c$  follows  $\text{LMgAS} < \text{LCaAS} < \text{LSrAS} < \text{LBaAS}$ .

### Supplementary Note S2:

Dorenbos suggested that the crystal field splitting in the 5d orbital of  $\text{Ce}^{3+}$  is independent of the centroid shift. Furthermore, the magnitude of the crystal field splitting was said to depend strongly on the coordination geometry rather than on the type of anion present. An empirical correlation between the shape of the first anion coordination polyhedron and the crystal field splitting can be deduced as

$$\varepsilon_{cfs} = \beta_{poly}^Q R_{av}^{-2} \quad (3)$$

$$R_{av} = \frac{1}{N} \sum_1^N (R_i - 0.6\Delta R) \quad (4)$$

where  $\beta_{poly}^Q$  is a constant determined by the type of the coordination polyhedron and the charge valence of the lanthanide.  $R_i$  is the bond length between the luminescence center and its  $N$  coordinated anions in the unrelaxed lattice.  $\Delta R$  indicates the radius difference between the lanthanide dopant and the host cation. Note that  $0.6\Delta R$  represents a pseudorelaxation in bond length.

When the  $M^{2+}$  replaces  $\text{Lu}^{3+}$ , the  $\text{MO}_8$  polyhedron will expand as the radius of  $M^{2+}$  increases, and at the same time this leads to a decrease in the Ce-O bond length in  $\text{CeO}_8$ . Since the  $R_i$  in  $\text{LMAS}:\text{Ce}^{3+}$  follows  $\text{Mg} > \text{Ca} > \text{Sr} > \text{Ba}$ , the  $R_{av}$  should follow  $\text{Mg} > \text{Ca} > \text{Sr} > \text{Ba}$  according to Equation S4. Therefore, the  $\varepsilon_{cfs}$  in  $\text{LMAS}:\text{Ce}^{3+}$  follows  $\text{Mg} < \text{Ca} < \text{Sr} < \text{Ba}$  (Equation S3).

### Supplementary Note S3:

According to the study of Wu et al. (Chem. Phys. Lett. 2007, 441, 250), the lattice distortion extent in  $\text{Ce}^{3+}$ -doped garnets can be evaluated by a ratio of the O-O bond distances  $d_{88}$  and  $d_{81}$  ( $d_{88}/d_{81}$ ).  $d_{88}$  represents an O-O bond distance that is shared with an adjacent dodecahedron, while  $d_{81}$  represents an O-O bond distance shared with an adjacent tetrahedron. Table s2 below lists the values of  $d_{88}$  and  $d_{81}$  derived from the XRD Rietveld refinements on  $\text{LMAS}:\text{Ce}^{3+}$  phosphors. There is no obvious change in  $d_{88}/d_{81}$ , indicating no obvious lattice distortion occurred in  $\text{LMAS}:\text{Ce}^{3+}$  when M changes from Mg to Ba. Therefore, the reduced Stokes shift should be the major influencing factor for the blue shift.

### Supplementary Note S4:

$\text{CASN}:\text{Eu}^{2+}$  is introduced into PiG as the red supplement. As suggested, we performed some experiments to show if the  $\text{CASN}:\text{Eu}^{2+}$  red-emitting phosphor is thermally degraded after sintering. XRD analyses on  $\text{CASN}:\text{Eu}$  PiG demonstrate the retain of  $\text{CASN}:\text{Eu}$  in glass matrix after co-sintering and no new impurity phases produced (Fig. S9). However, both of the luminescent decay lifetime and quantum efficiency get decreased, which indicate thermal degradation of  $\text{CASN}:\text{Eu}$  (Fig. S10). Attempting to reveal the latent degradation mechanism, an additional experiment was performed by directly heating  $\text{CASN}:\text{Eu}$  phosphor powders to temperature identical to the co-sintering temperature (690 °C) and holding for the same duration (30 min). The measured luminescence decay curve and QE before/after heating are presented in Fig. S11. Upon heating, the calculated lifetime decreases from 660 ns to 604 ns, and the QE decreases from 87% to 55%. Correlating with the results of  $\text{CASN}:\text{Eu}$  PiG (lifetime: 577 ns and QE: 33%), one can deduce that both the thermal degradation in  $\text{CASN}:\text{Eu}$  itself (due to high vaporization ability of N) and the thermal corrosion via interfacial reaction between  $\text{CASN}:\text{Eu}$  and glass play an equivalent role in the luminescent loss. In future work, we will attempt to minimize the thermal degradation effect in  $\text{CASN}:\text{Eu}^{2+}$  by more rational glass composition design or adopting a rapid-sintering technique. To be mentioned, the relatively poor  $\text{CASN}:\text{Eu}^{2+}$  luminescent performance does not influence the core results of this work.

**Table S1.** Refined results of LMAS:Ce<sup>3+</sup> phosphor powders.

| phosphor type                   | LMgAS:Ce <sup>3+</sup> | LCaAS:Ce <sup>3+</sup> | LSrAS:Ce <sup>3+</sup> | LBaAS:Ce <sup>3+</sup> |
|---------------------------------|------------------------|------------------------|------------------------|------------------------|
| Space group                     | Ia <sup>3</sup> d      |                        |                        |                        |
| $\alpha=\beta=\gamma(^{\circ})$ | 90                     |                        |                        |                        |
| a=b=c(Å)                        | 11.8865                | 11.9188                | 11.9193                | 11.9195                |
| V(Å <sup>3</sup> )              | 1679.411               | 1693.178               | 1693.396               | 1693.462               |
| R <sub>wp</sub>                 | 5.52                   | 5.68                   | 6.52                   | 7.77                   |
| R <sub>p</sub>                  | 3.91                   | 4.06                   | 7.64                   | 5.79                   |
| $\chi^2$                        | 3.28                   | 3.22                   | 5.78                   | 4.58                   |

**Table S2.** The calculated d<sub>88</sub>/d<sub>81</sub> of the LMAS:Ce<sup>3+</sup> phosphors derived from the XRD Rietveld refinement.

| phosphor type | d <sub>88</sub> (Å) | d <sub>81</sub> (Å) | d <sub>88</sub> /d <sub>81</sub> |
|---------------|---------------------|---------------------|----------------------------------|
| LMgAS         | 2.7457              | 2.8724              | 0.95589                          |
| LCaAS         | 2.7532              | 2.8802              | 0.95591                          |
| LSrAS         | 2.6347              | 2.7533              | 0.95692                          |
| LBaAS         | 2.7534              | 2.8803              | 0.95594                          |

**Table S3.** Full Set of 15 CRIs and the General Ra of LBaAS:Ce<sup>3+</sup>+CASN:Eu<sup>2+</sup> PiGF-on-SP (C:R = 15:1) under 1 W/mm<sup>2</sup> blue laser excitation.

|                |                |                 |                 |                 |                 |                 |                 |
|----------------|----------------|-----------------|-----------------|-----------------|-----------------|-----------------|-----------------|
| R <sub>a</sub> | R <sub>1</sub> | R <sub>2</sub>  | R <sub>3</sub>  | R <sub>4</sub>  | R <sub>5</sub>  | R <sub>6</sub>  | R <sub>7</sub>  |
| 90.1           | 90             | 92              | 87              | 90              | 93              | 82              | 90              |
| R <sub>8</sub> | R <sub>9</sub> | R <sub>10</sub> | R <sub>11</sub> | R <sub>12</sub> | R <sub>13</sub> | R <sub>14</sub> | R <sub>15</sub> |

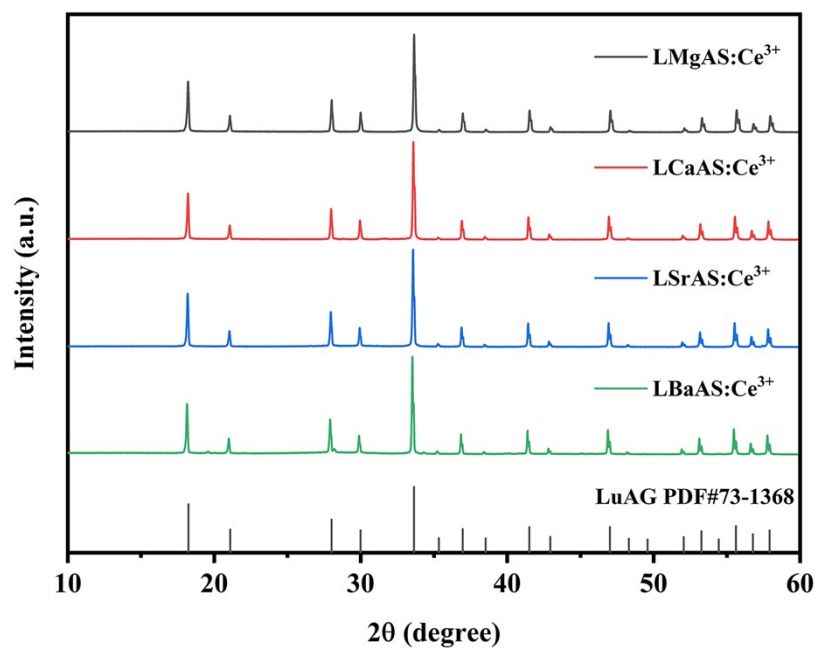

**Fig. S1.** XRD patterns of the LMAS:Ce<sup>3+</sup> phosphor powders.

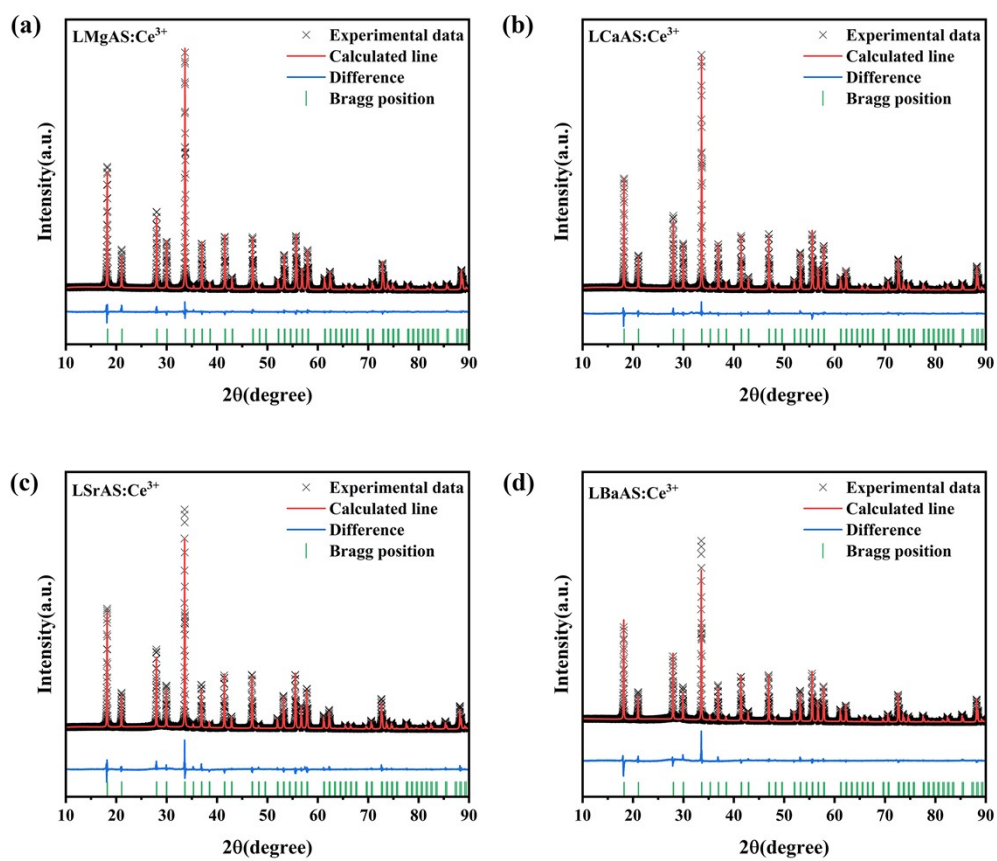

**Fig. S2.** Rietveld refinement of XRD patterns for LMAS:Ce<sup>3+</sup> phosphor powders.

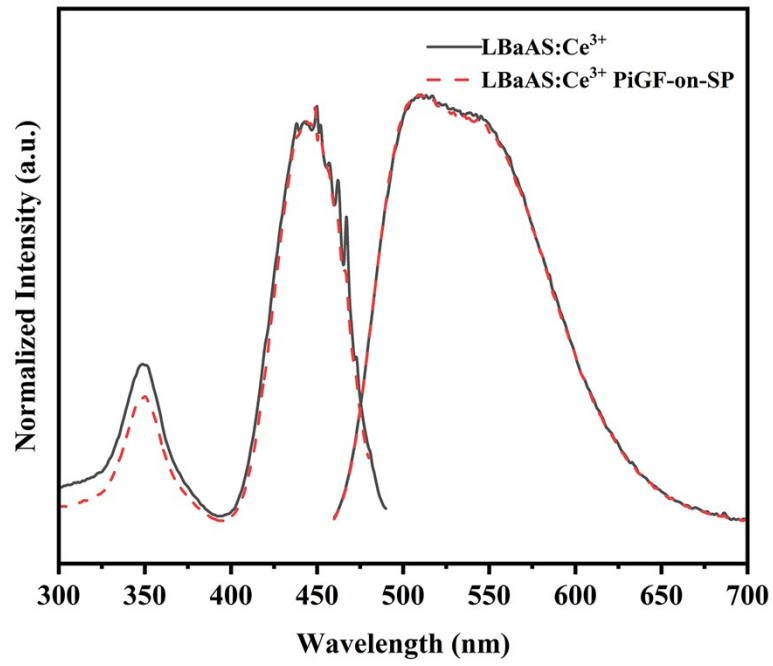

**Fig. S3.** PLE and PL spectra of LBaAS:Ce<sup>3+</sup> phosphor powder and the corresponding PiGF-on-SP sample.

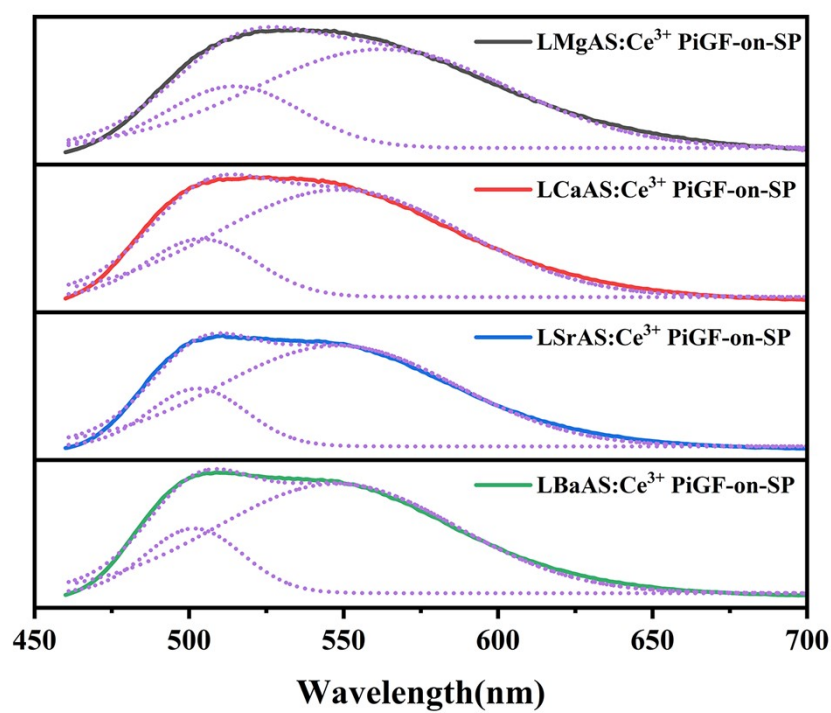

**Fig. S4.** The Gaussian fitting for the PL spectra of LMAS:Ce<sup>3+</sup> PiGF-on-SP.



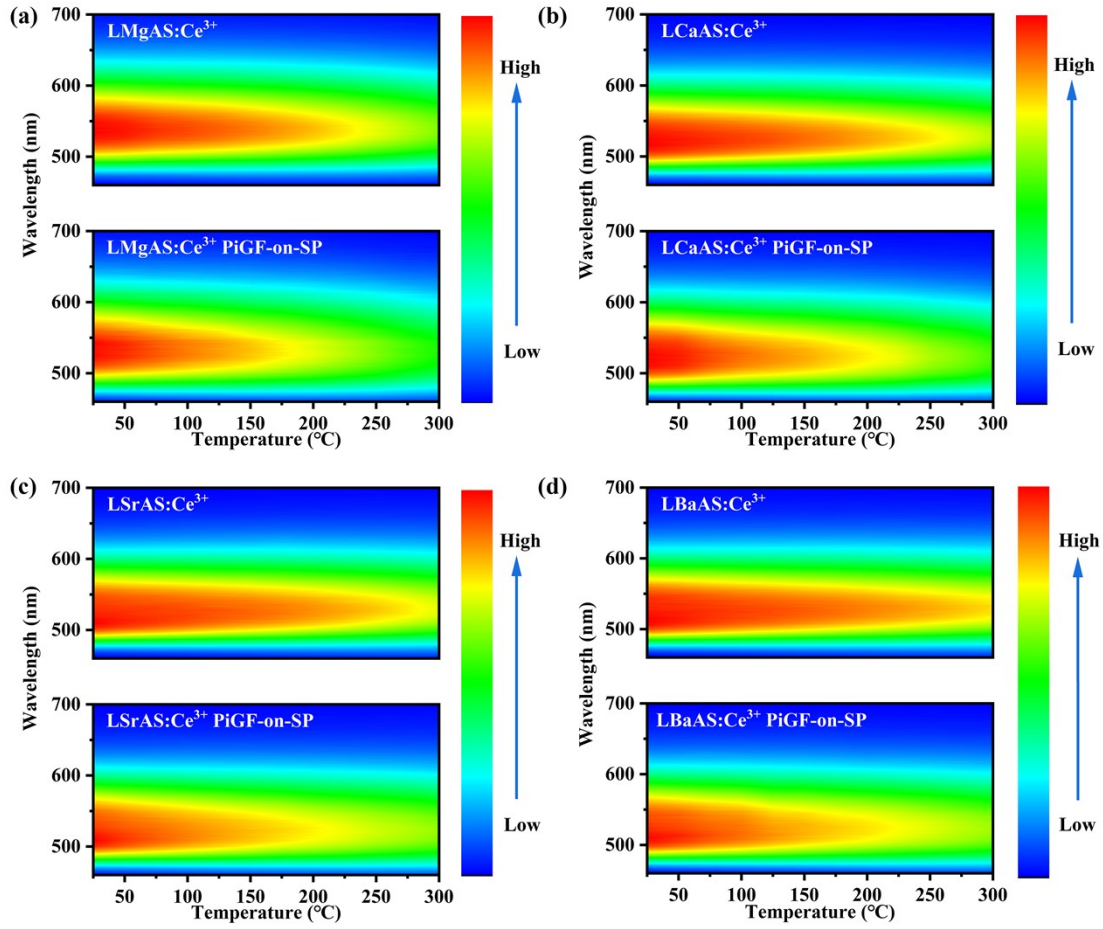

**Fig. S5.** 2D-contour plot of temperature-dependent PL spectra for (a) LMgAS:Ce<sup>3+</sup> and LMgAS:Ce<sup>3+</sup> PiGF-on-SP, (b) LCaAS:Ce<sup>3+</sup> and LCaAS:Ce<sup>3+</sup> PiGF-on-SP, (c) LSrAS:Ce<sup>3+</sup> and LSrAS:Ce<sup>3+</sup> PiGF-on-SP and (d) LBaAS:Ce<sup>3+</sup> and LBaAS:Ce<sup>3+</sup> PiGF-on-SP.

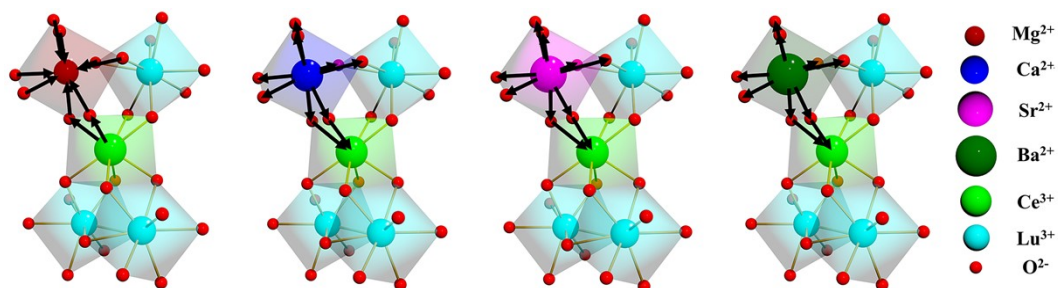

**Fig. S6.** Schematic diagram of the effect of the change in M cation size on the Ce-O bond

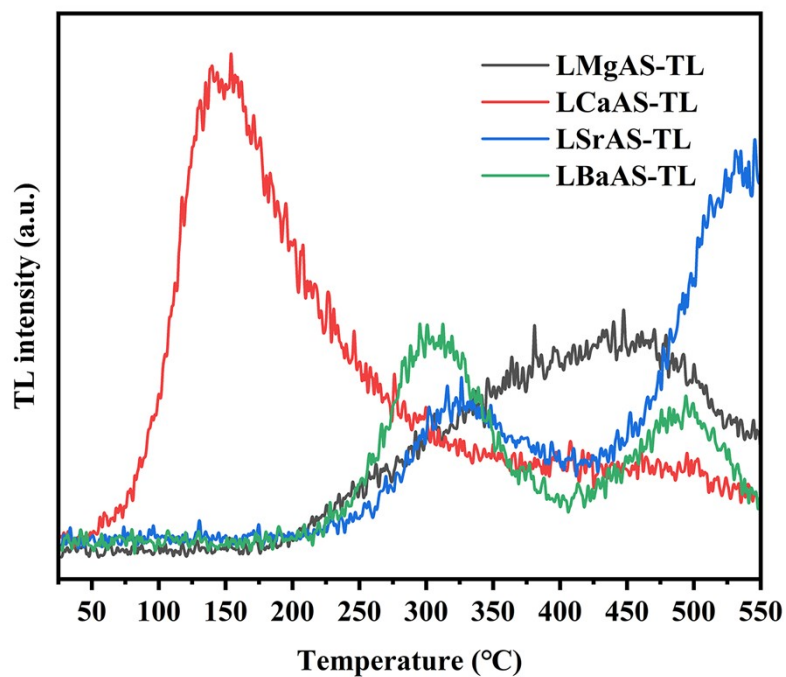

**Fig. S7.** TL glow curves of LMAS:Ce<sup>3+</sup> (M=Mg, Ca, Sr and Ba) measured after 450 nm excitation at 300 K for 5 min. The monitored emission wavelengths are 537, 522, 511 and 509 nm, respectively.

Thermoluminescence (TL) spectrum is an effective tool to probe trap properties. TL peak position and TL integrated intensity are correlated with the trap depth and trap concentration, respectively. In Figure S7, TL spectra of LMAS:Ce<sup>3+</sup> (M=Mg, Ca, Sr and Ba) were measured and compared with each other. There is no obvious regularity, therefore it is hard to ascertain the contribution from defects. However, LBaAS shows the lowest trap concentrations which may be responsible for its highest IQE.

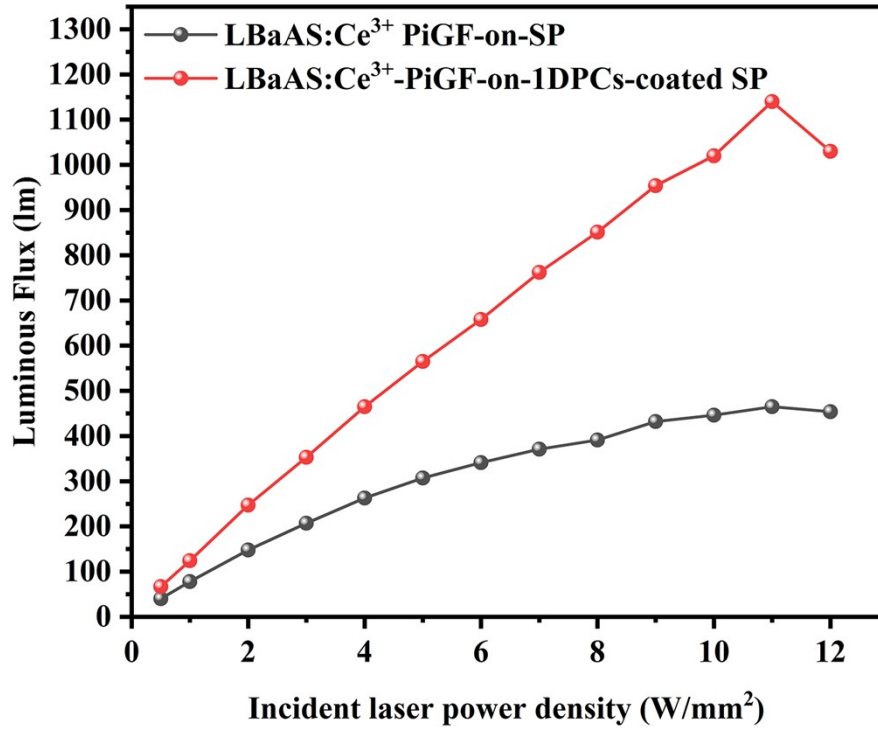

**Fig. S8.**  $P_{in}$  dependent luminous flux of samples in the presence/absence of 1DPCs film.

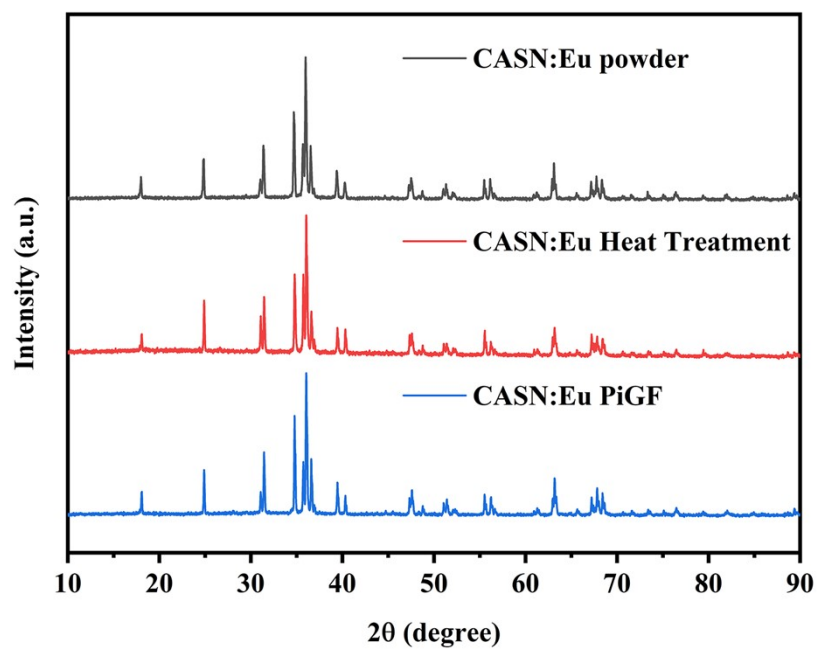

**Fig. S9.** XRD patterns of CASN:Eu phosphor powders before/after heat treatment at 690 °C for 30 min and CASN:Eu PiGF.

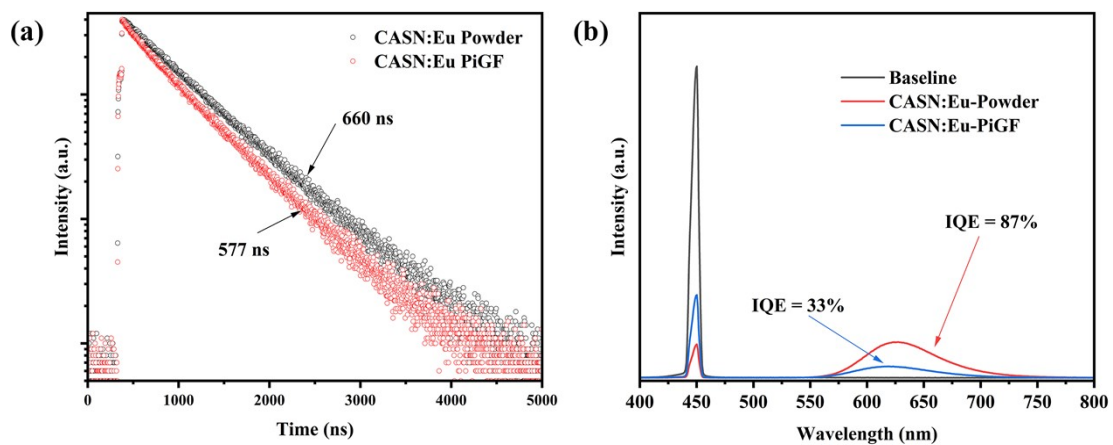

**Fig. S10.** Comparisons made on luminescent decay curves and QEs of CASN:Eu phosphor powders and CASN:Eu PiGF.

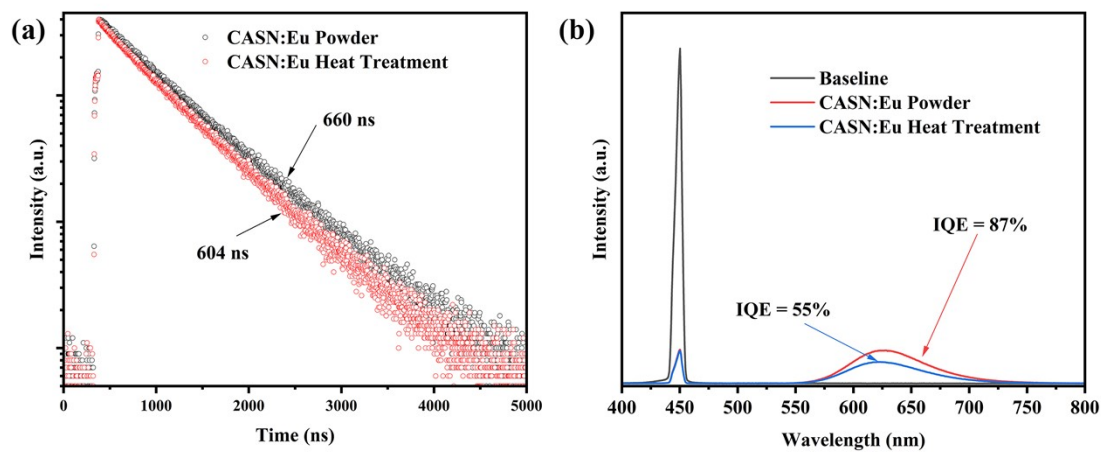

**Fig. S11.** Comparisons made on luminescent decay curves and QEs of CASN:Eu phosphor powders before/after heat treatment at 690 °C for 30 min.
